# Supplementary material
Source: PubMed Central journal article supplement (PMC3850775)
Supplement: NIHMS514493-supplement-01.pdf [file NIHMS514493-supplement-01.pdf]

## **Prevalence and Risk Factors for Hypertension in Hemophilia**

### **Online Supplemental Data Table**

Annette von Drygalski<sup>1,2</sup>, Nicholas A Kolaitis<sup>1</sup>, Ricki Bettencourt<sup>3</sup>, Jaclyn Bergstrom<sup>3</sup>, R Kruse-Jarres<sup>4</sup>, Doris VK Quon<sup>5</sup>, Christina Wassel<sup>3</sup>, Ming C Li<sup>4</sup>, Jill Waalen<sup>2</sup>, Darlene J Elias<sup>2</sup>, Laurent O Mosnier<sup>2</sup>, Matthew Allison<sup>3</sup>

#### **Affiliation:**

<sup>1</sup> University of California San Diego, Department of Medicine, Division of Hematology/Oncology, San Diego, CA, USA

<sup>2</sup> The Scripps Research Institute, Department of Molecular and Experimental Medicine, La Jolla, CA

<sup>3</sup> University of California San Diego, Department of Family and Preventive Medicine, Division of Epidemiology, San Diego, CA, USA

<sup>4</sup> Tulane University, School of Medicine, Section of Hematology/Oncology, New Orleans, USA

<sup>5</sup> Hemophilia Treatment Center, Orthopaedic Hospital, Los Angeles, CA

#### **Short title: von Drygalski- Hypertension of Hemophilia**

#### **Corresponding author:**

Annette von Drygalski, MD, Pharm D  
University of California San Diego  
Hemophilia and Thrombosis Treatment Center  
Medical Offices South  
4168 Front Street  
San Diego, CA 92103-8651  
Office (619) 471-0335  
Fax (619) 471 -0338  
[avondrygalski@ucsd.edu](mailto:avondrygalski@ucsd.edu)

**Table S1.**  
**Univariate Risk Analysis for Hypertension (HTN)**

| <b>Risk Factors</b>                   | <b>No HTN<br/>(n=233)</b> | <b>HTN<br/>(n=225)</b> | <b>p-value</b>   |
|---------------------------------------|---------------------------|------------------------|------------------|
| <b>Age, years</b>                     | 34.4 ± 10.8               | 48.3 ± 15.3            | <b>&lt;.0001</b> |
| <b>Ethnicity, n (%)</b>               |                           |                        | .10              |
| White                                 | 114 (48.9%)               | 128 (56.9%)            |                  |
| Black                                 | 26 (11.2%)                | 24 (10.7%)             |                  |
| Hispanic                              | 67 (28.8%)                | 43 (19.1%)             |                  |
| Other                                 | 26 (11.2%)                | 30 (13.3%)             |                  |
| <b>BMI, kg/m<sup>2</sup></b>          | 26.2 ± 5.5                | 28.2 ± 6.0             | <b>.0005</b>     |
| <b>Ever Smoker, n (%)</b>             | 62 (26.6%)                | 75 (33.3%)             | .06              |
| <b>Diabetes, n (%)</b>                | 4 (1.7%)                  | 31 (13.8%)             | <b>&lt;.0001</b> |
| <b>Creatinine</b>                     | 0.83 (0.26)               | 0.90 (0.20)            | <b>.002</b>      |
| <b>eGFR, mL/min/1.73m<sup>2</sup></b> | 112.0 ± 18.2              | 94.4 ± 25.9            | <b>&lt;.0001</b> |
| <b>HIV, n (%)</b>                     |                           |                        | .20              |
| Not Tested                            | 18 (7.7%)                 | 14 (6.2%)              |                  |
| Positive                              | 45 (19.3%)                | 59 (26.2%)             |                  |
| Negative                              | 170 (73.0%)               | 152 (67.6%)            |                  |
| <b>HepC positive, n (%)</b>           |                           |                        | <b>.006</b>      |
| Not Tested                            | 11 (4.7%)                 | 10 (4.4%)              |                  |
| Positive                              | 137 (58.8%)               | 163 (72.4%)            |                  |
| Negative                              | 85 (36.5%)                | 52 (23.1%)             |                  |
| <b>Hemophilia Severity, n (%)</b>     |                           |                        | <b>.0004</b>     |
| Mild                                  | 64 (27.5%)                | 70 (31.1%)             |                  |
| Moderate                              | 23 (9.9%)                 | 49 (21.8%)             |                  |
| Severe                                | 146 (62.7%)               | 106 (42.1%)            |                  |

eGFR = estimated Glomerular Filtration Rate; BMI = Body mass Index;  
HepC = Hepatitis C
